# Supplementary material for: Tailoring Water Dissociation Energy by Platinum Single-Atom Catalyst Coupled with Transition Metal/metal Oxide Heterostructure for Accelerating Alkaline Hydrogen Evolution Reaction
Source: Research Square preprint supplement (doi:10.21203/rs.3.rs-155535/v1), 2021-02-03
Supplement: Supplementary file 1 [file d2e3d99437aefdcafcc9580a.docx]

Supporting Information

**Tailoring Water Dissociation Energy by Platinum Single-Atom Catalyst Coupled with Transition Metal/metal Oxide Heterostructure for Accelerating Alkaline Hydrogen Evolution Reaction**

Kai Ling Zhou,a Zelin Wang,a Chang Bao Han,*a Xiaoxing Ke,*a Changhao Wang,a Yuhong Jin,a Qianqian Zhang,a Jingbing Liu, a Hao Wang*a and Hui Yana

a. Faculty of Materials and Manufacturing, Beijing University of Technology, Beijing 100124, P. R. China

E-mail: cbhan@bjut.edu; kexiaoxing@bjut.edu.cn.cn; haowang@bjut.edu.cn


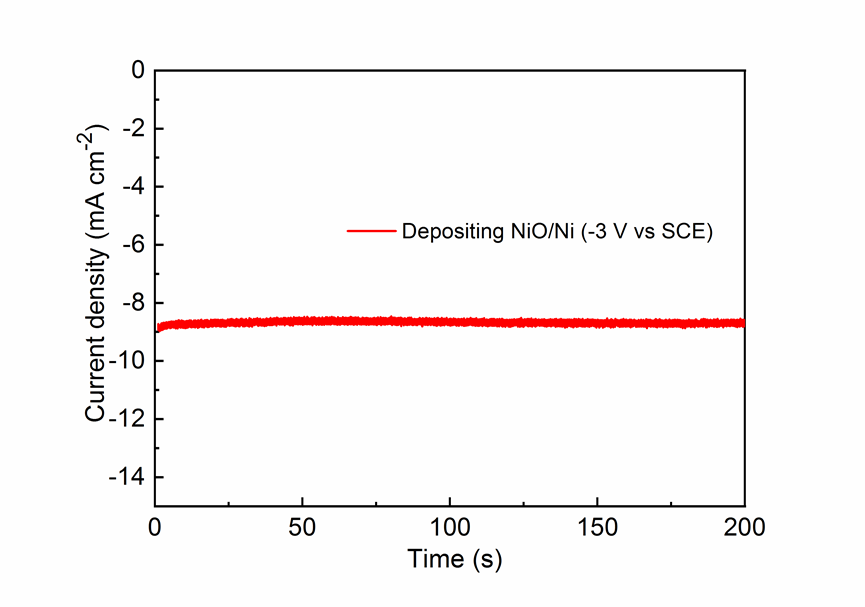


**Figure S1.** The electrochemical process with -3.0 V versus SCE for the deposition of NiO/Ni composite on the Ag NWs network.


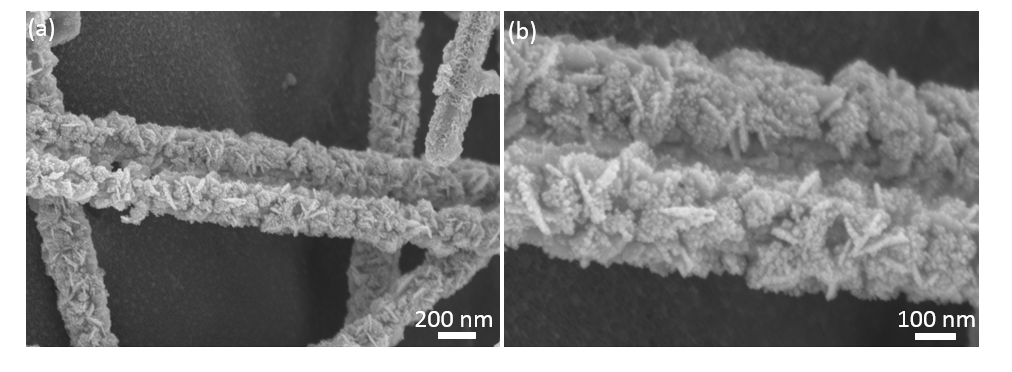


**Figure S2.** The scanning electron microscopy (SEM) images of NiO/Ni on Ag NWs with different magnifications.

**
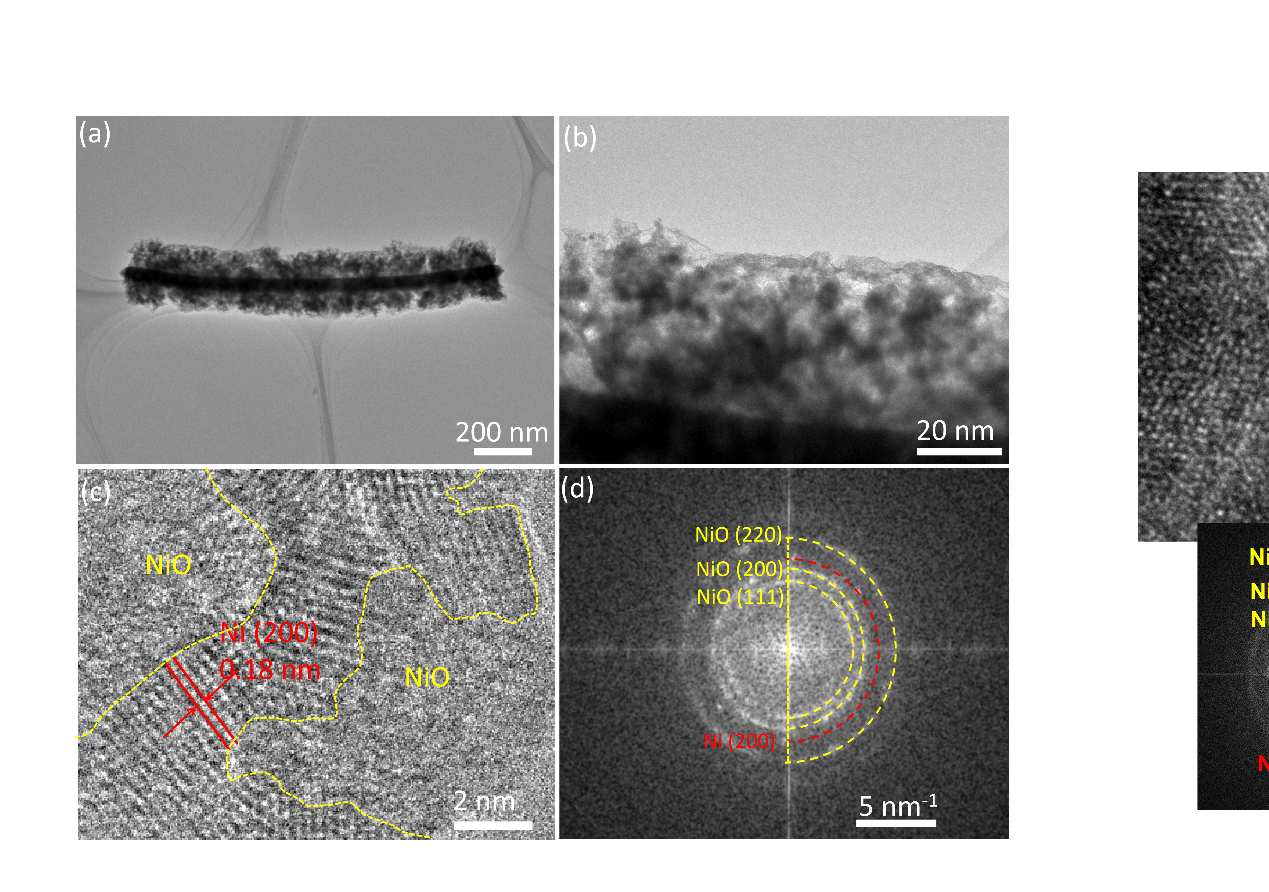
**

**Figure S3.** (a-b) Transmission electron microscopy (TEM) images, (c) high-resolution TEM (HRTEM) and (d) fast Fourier transform (FFT) images of Ag NWs supported NiO/Ni.


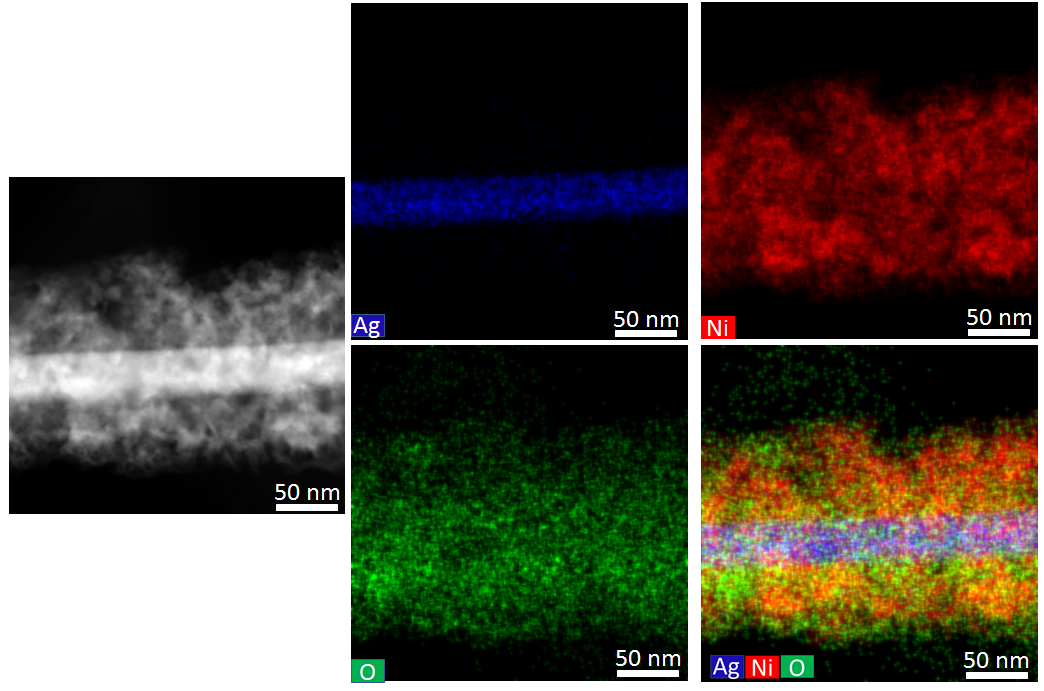


**Figure S4.** The elements mapping of Ag, Ni, and O in Ag NWs supported NiO/Ni.


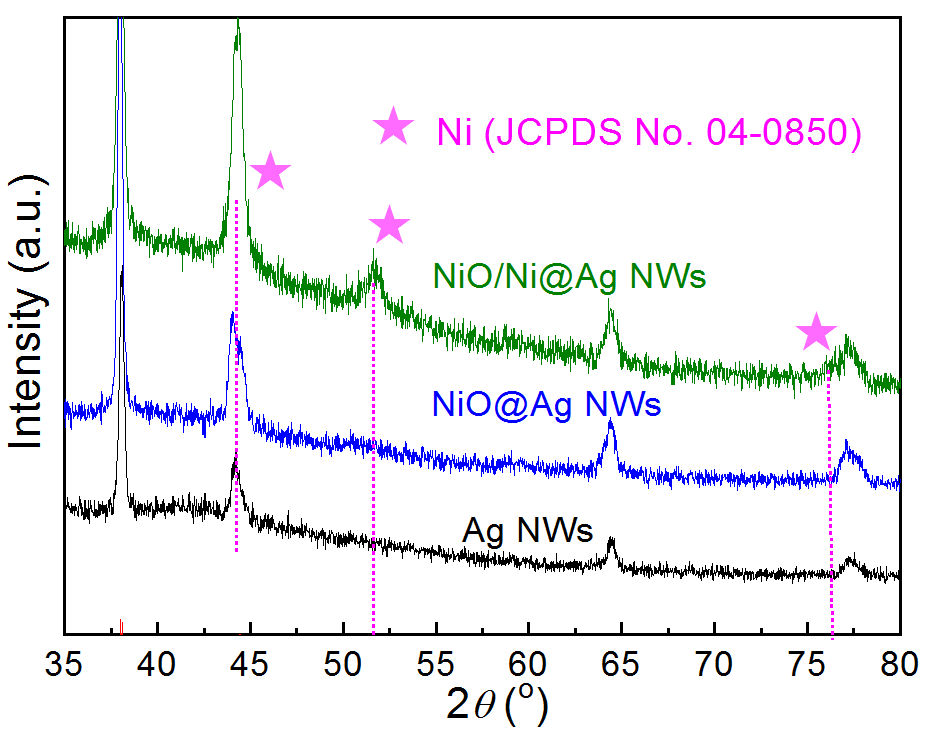


**Figure S5.** The X-ray diffraction (XRD) patterns of NiO/Ni and NiO on Ag NWs.





**Figure S6.** X-ray photoelectron spectroscopy spectra of NiO/Ni and NiO.


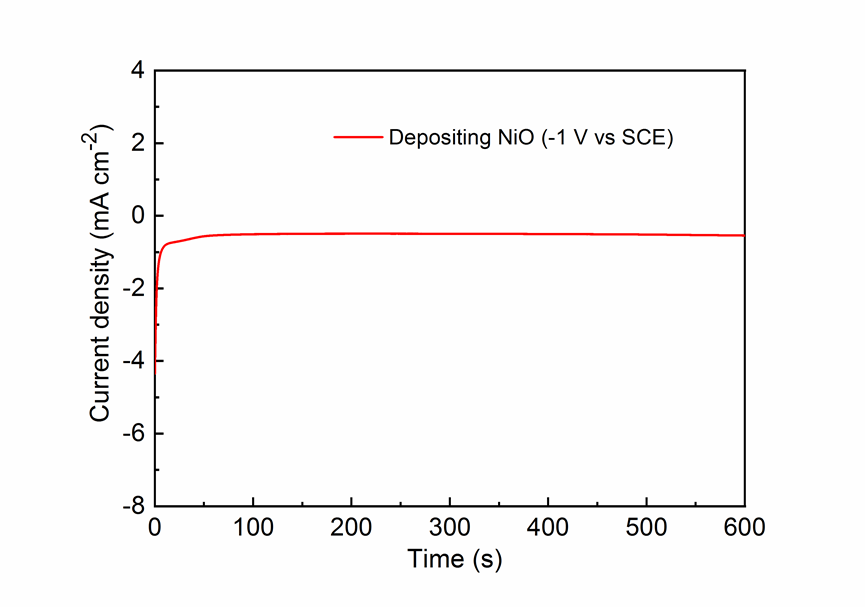


**Figure S7.** The electrochemical process with -1.0 V versus SCE for the deposition of NiO on the Ag NWs network.


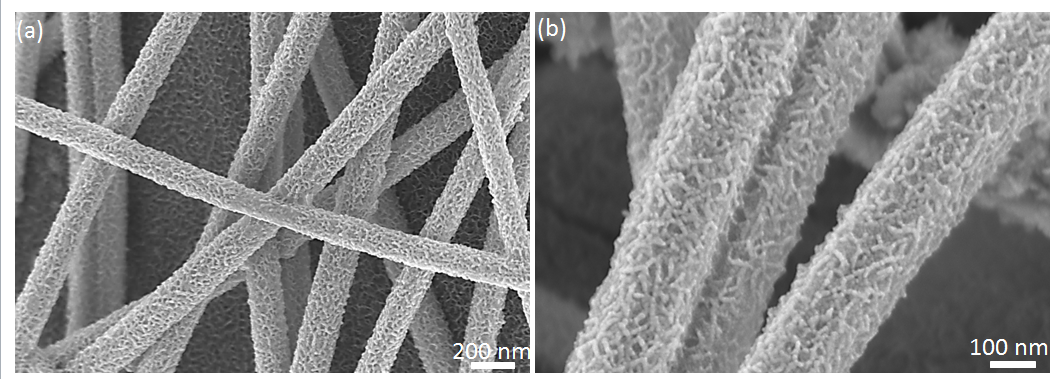


**Figure S8.** The SEM images of NiO on Ag NWs with different magnifications.


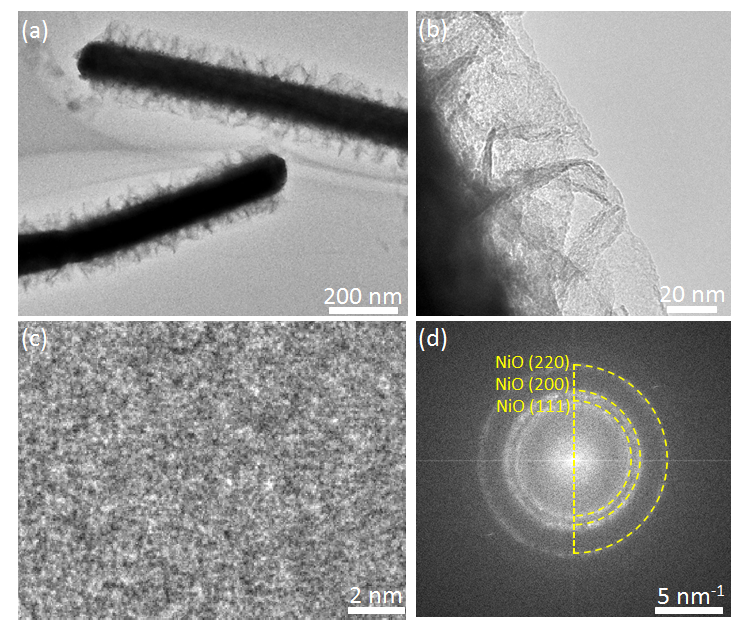


**Figure S9.** (a-b) TEM images, (c) HRTEM, and (d) FFT images of NiO on Ag NWs.


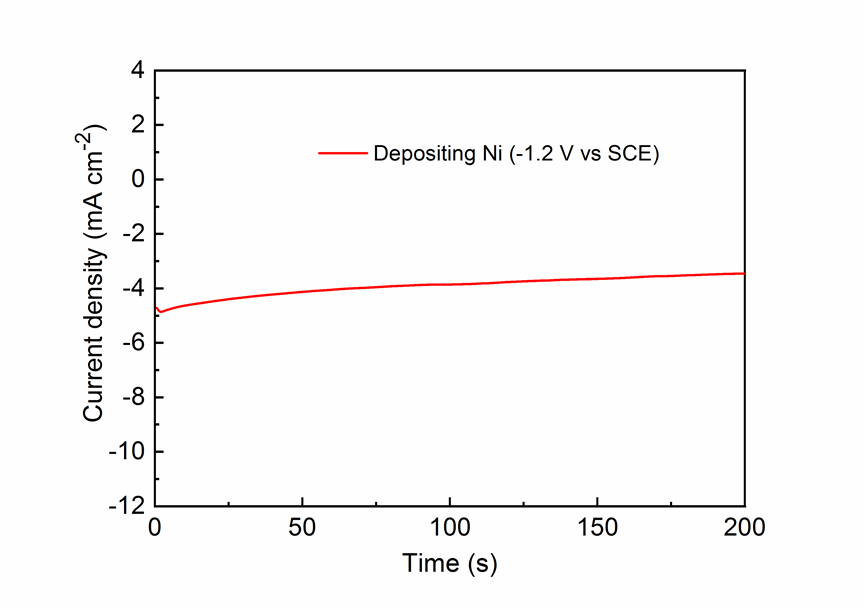


**Figure S10.** The electrochemical process with -1.2 V versus SCE for the deposition of metallic Ni on the Ag NWs network.


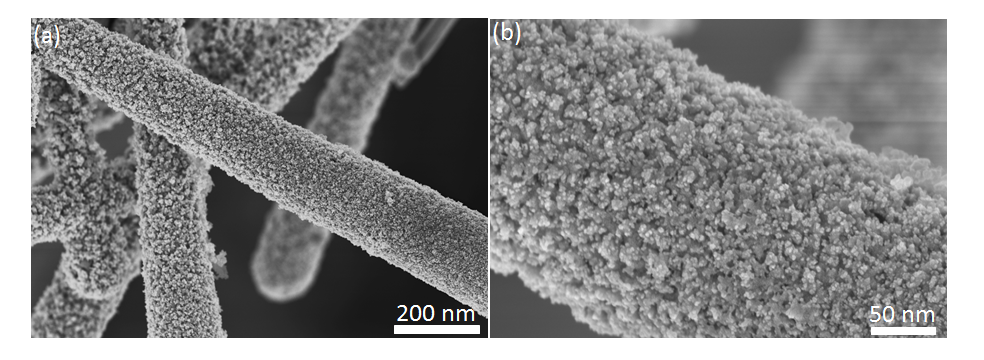


**Figure S11.** The SEM images of Ni on Ag NWs with different magnifications.


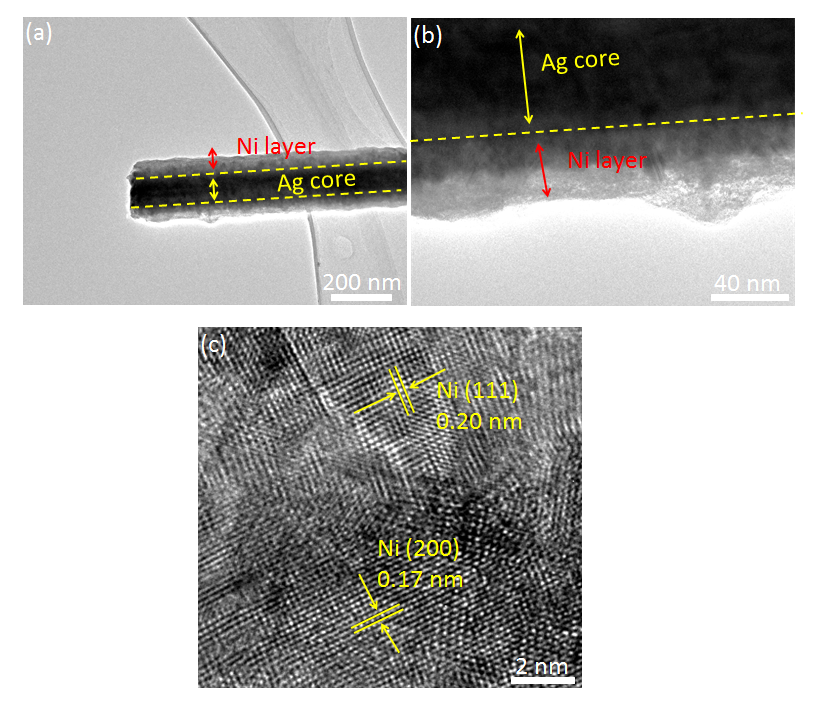


**Figure S12.** (a-b) TEM images and (c) HRTEM image of Ni.


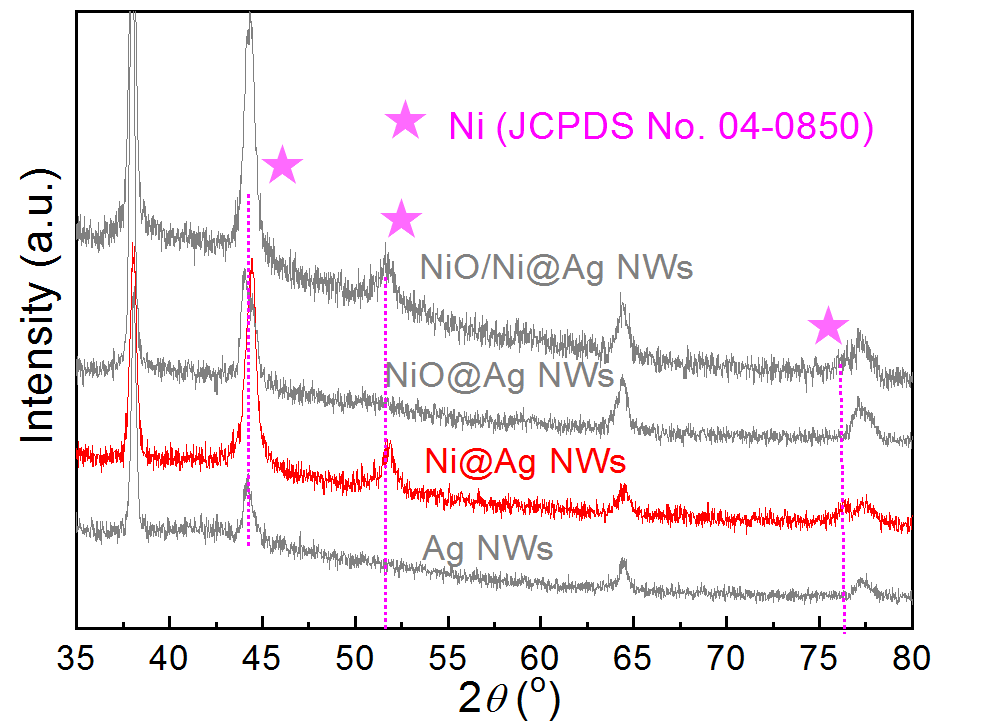


**Figure S13.** XRD patterns of Ag NWs supported Ni, and the XRD patterns of Ag NWs supported NiO/Ni and NiO are given as the comparison.


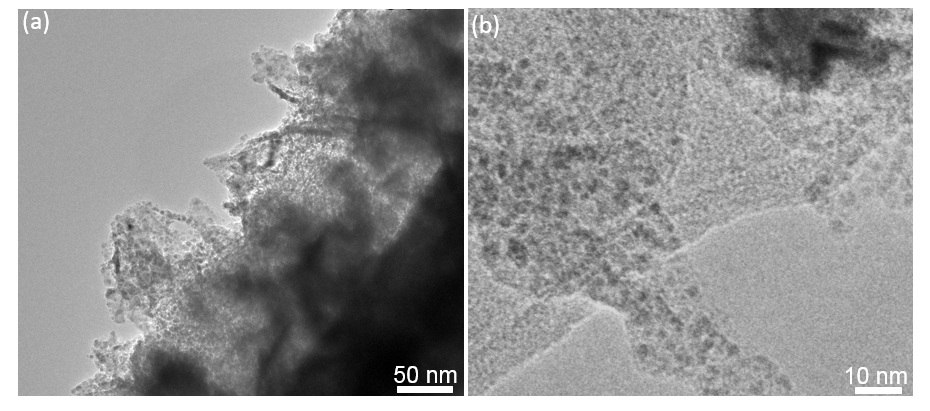


**Figure S14.** The scanning transmission electron microscopy (STEM) images of PtSA-NiO/Ni.


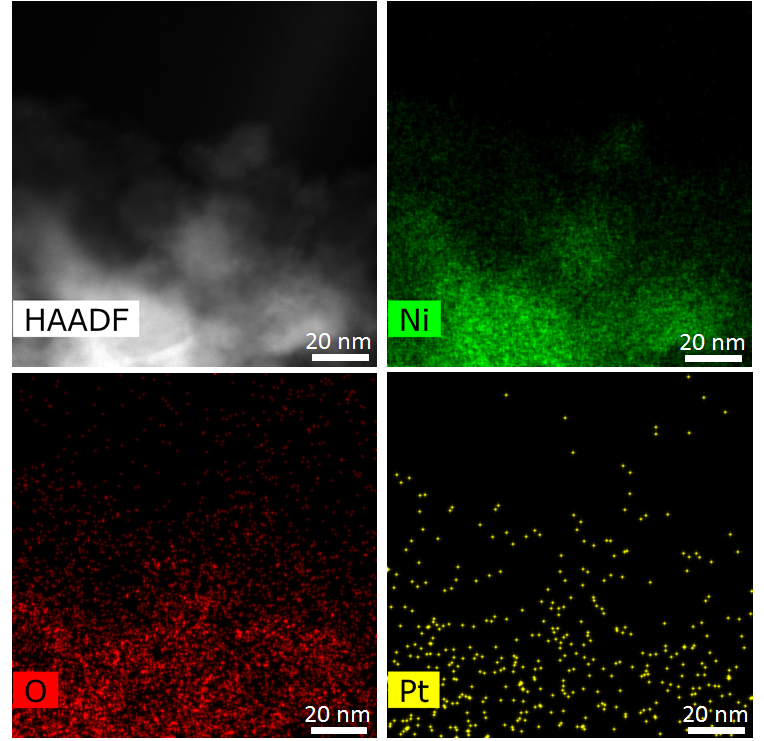


**Figure S15.** The elements mapping of Ni, O, and Pt in PtSA-NiO/Ni.


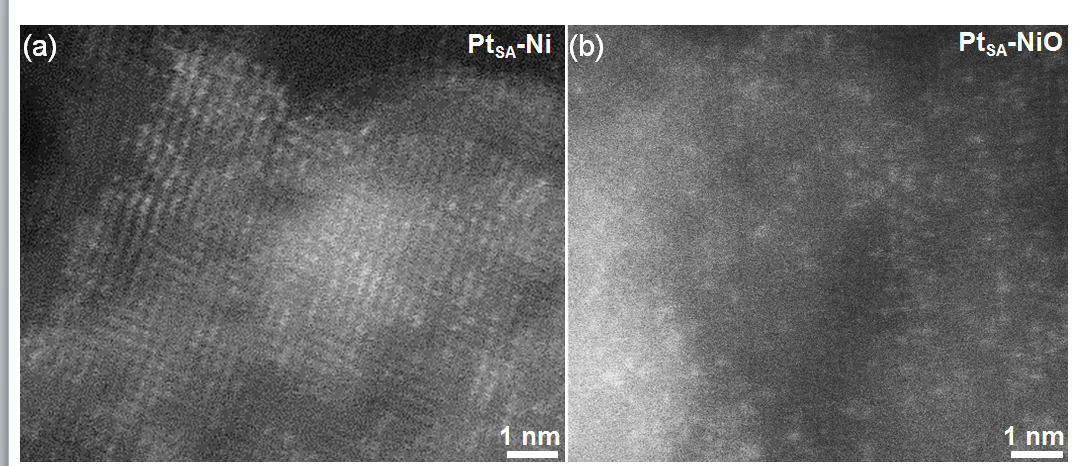


**Figure S16.** HAADF-STEM images of (a) PtSA-NiO and (b) PtSA-Ni, respectively.





**Figure S17.** The normalized difference spectra for Pt *L*3-edge XANES using Pt foil as reference. The oxidation states are fitted by integrating the area of the white-line peak from 11557 to 11574 eV.


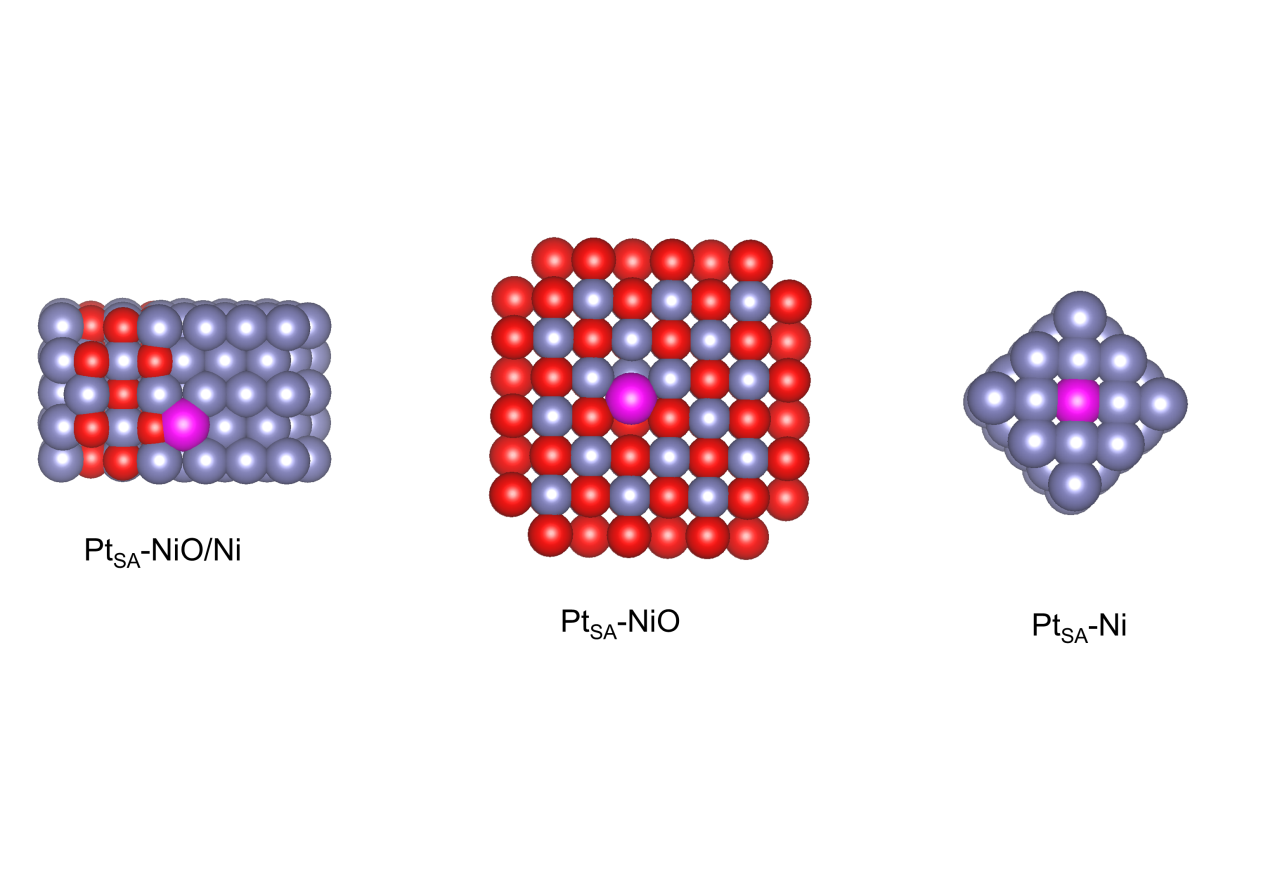


**Figure S18.** The DFT-optimized structure for (a) PtSA-NiO/Ni, (b) PtSA-NiO, and (c) PtSA-Ni catalysts, respectively based on the EXAFS analysis.


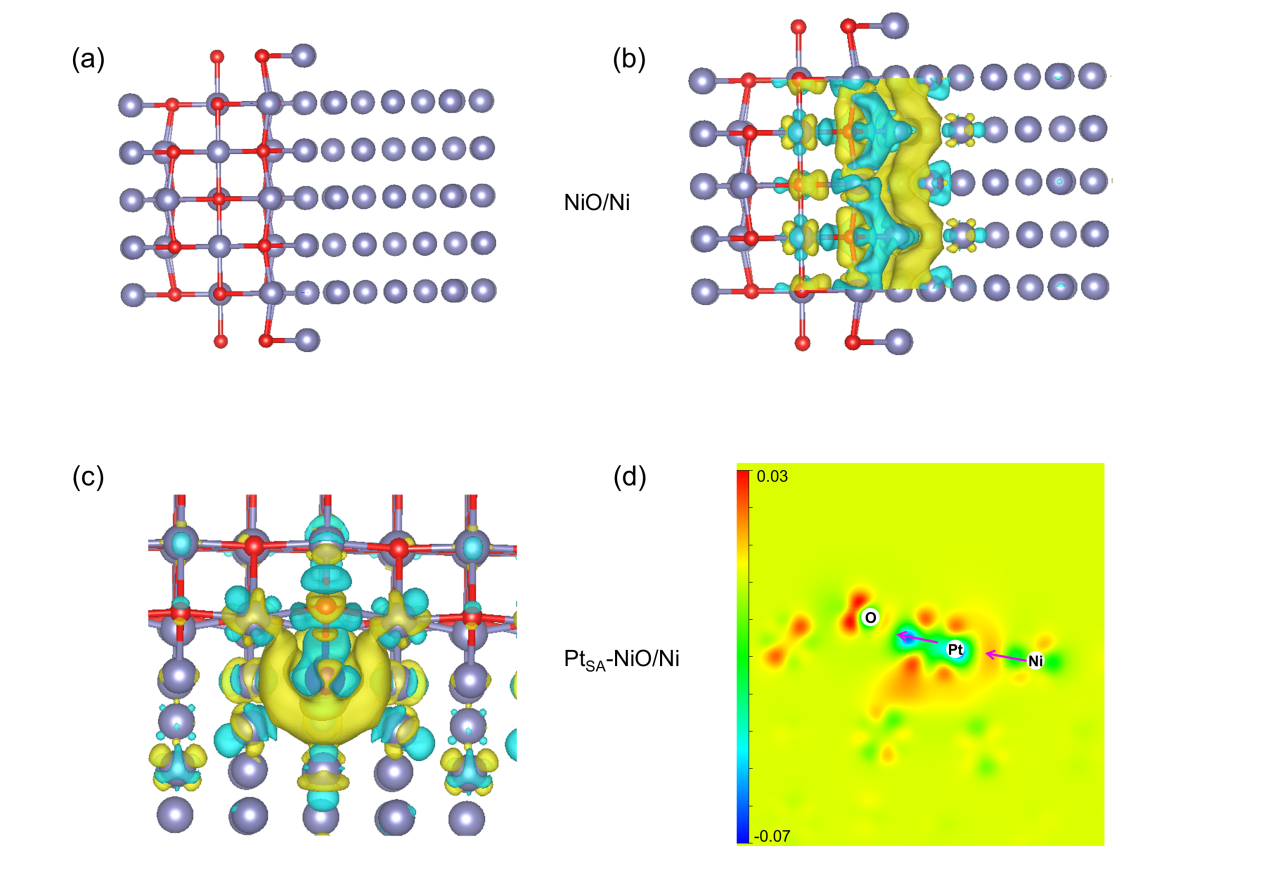


**Figure S19.** (a) Computational models of NiO/Ni heterostructure. (b) The localized electric field distribution of NiO/Ni heterostructure. (c) The localized electric field distribution of Pt atom at NiO/Ni phase junction. (d) 2D isosurface map of the cross-section consisting of Pt, Ni, and O atoms in PtSA-NiO/Ni with a unit of e A-3.





**Figure S20.** Highlighted total DOS of NiO/Ni and PtSA-NiO/Ni with aligned Fermi level.


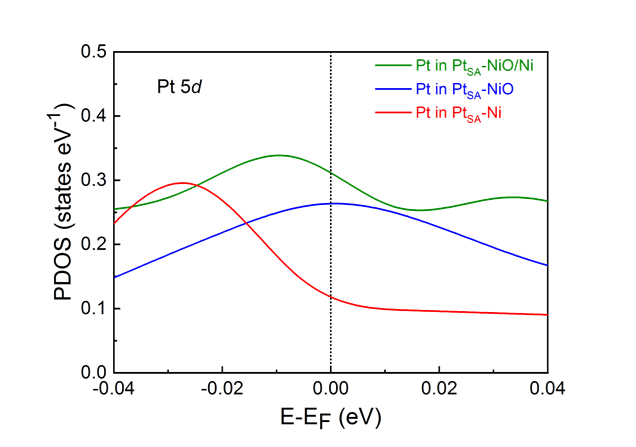


**Figure S21.** Highlighted Pt 5*d* band of PtSA-NiO, PtSA-Ni, and PtSA-NiO/Ni with aligned Fermi level.


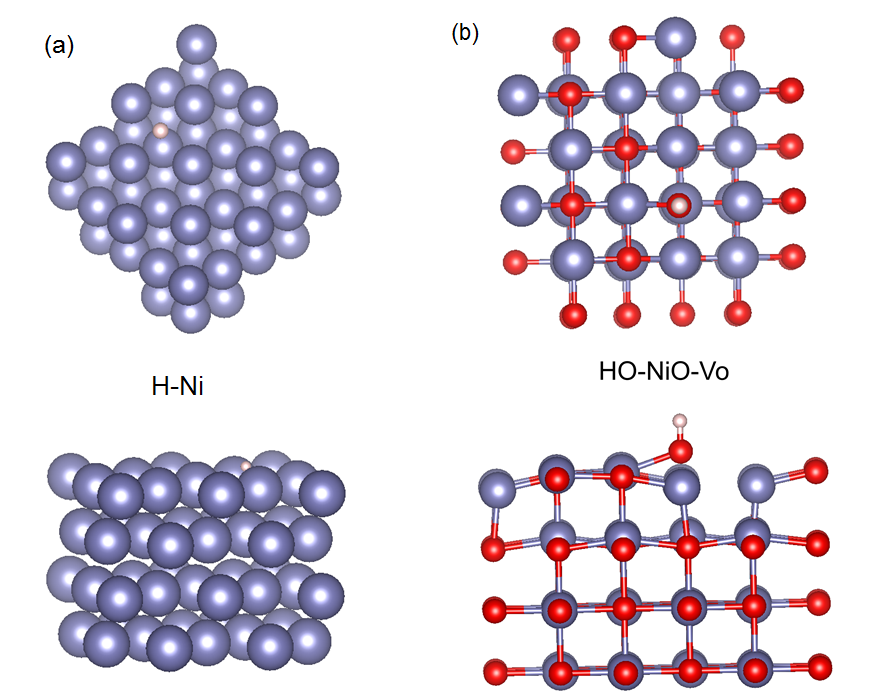


**Figure S22.** The optimal absorption site of metallic Ni for H, and O vacancies coupled NiO for HO.





**Figure S23.** O 1*s* spectra of NiO/Ni and NiO.


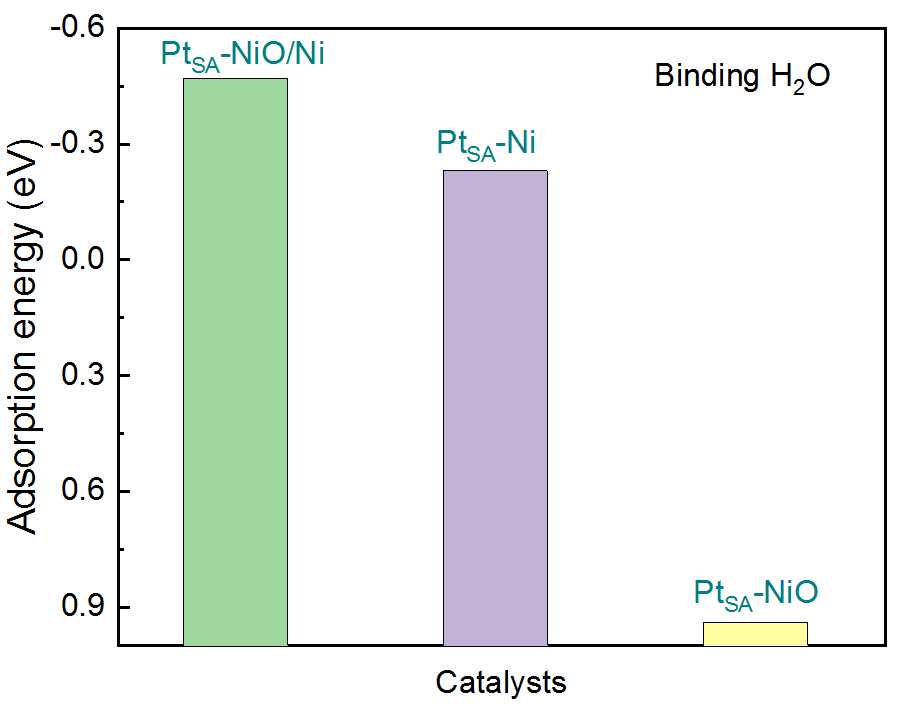


**Figure S24.** Calculated H2O adsorption energies of PtSA-NiO/Ni, PtSA-NiO and PtSA-Ni catalysts


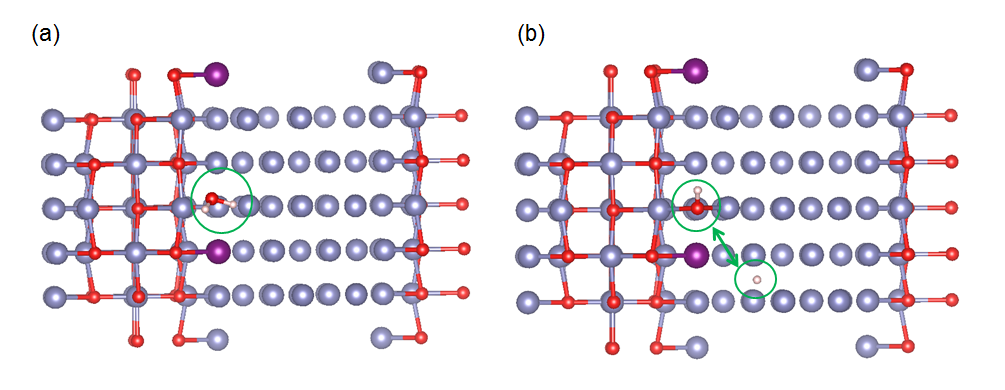


**Figure S25.** The optimal absorption site of PtSA-NiO/Ni catalyst for the dissociation of H2O into OH and H.


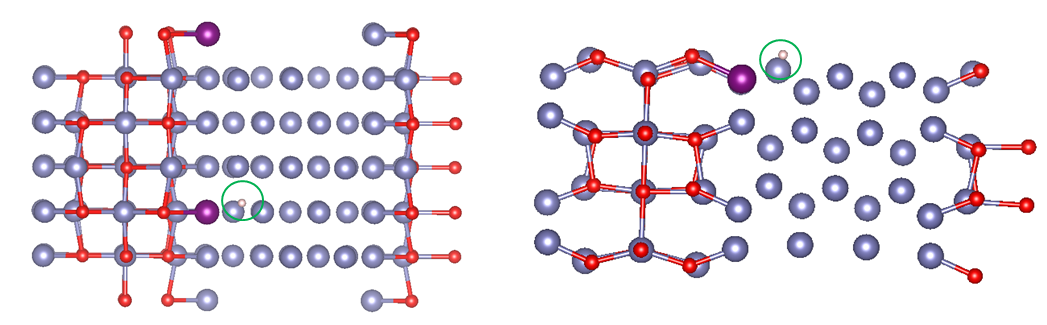


**Figure S26.** The optimal absorption site of PtSA-NiO/Ni catalyst for the dissociated proton.


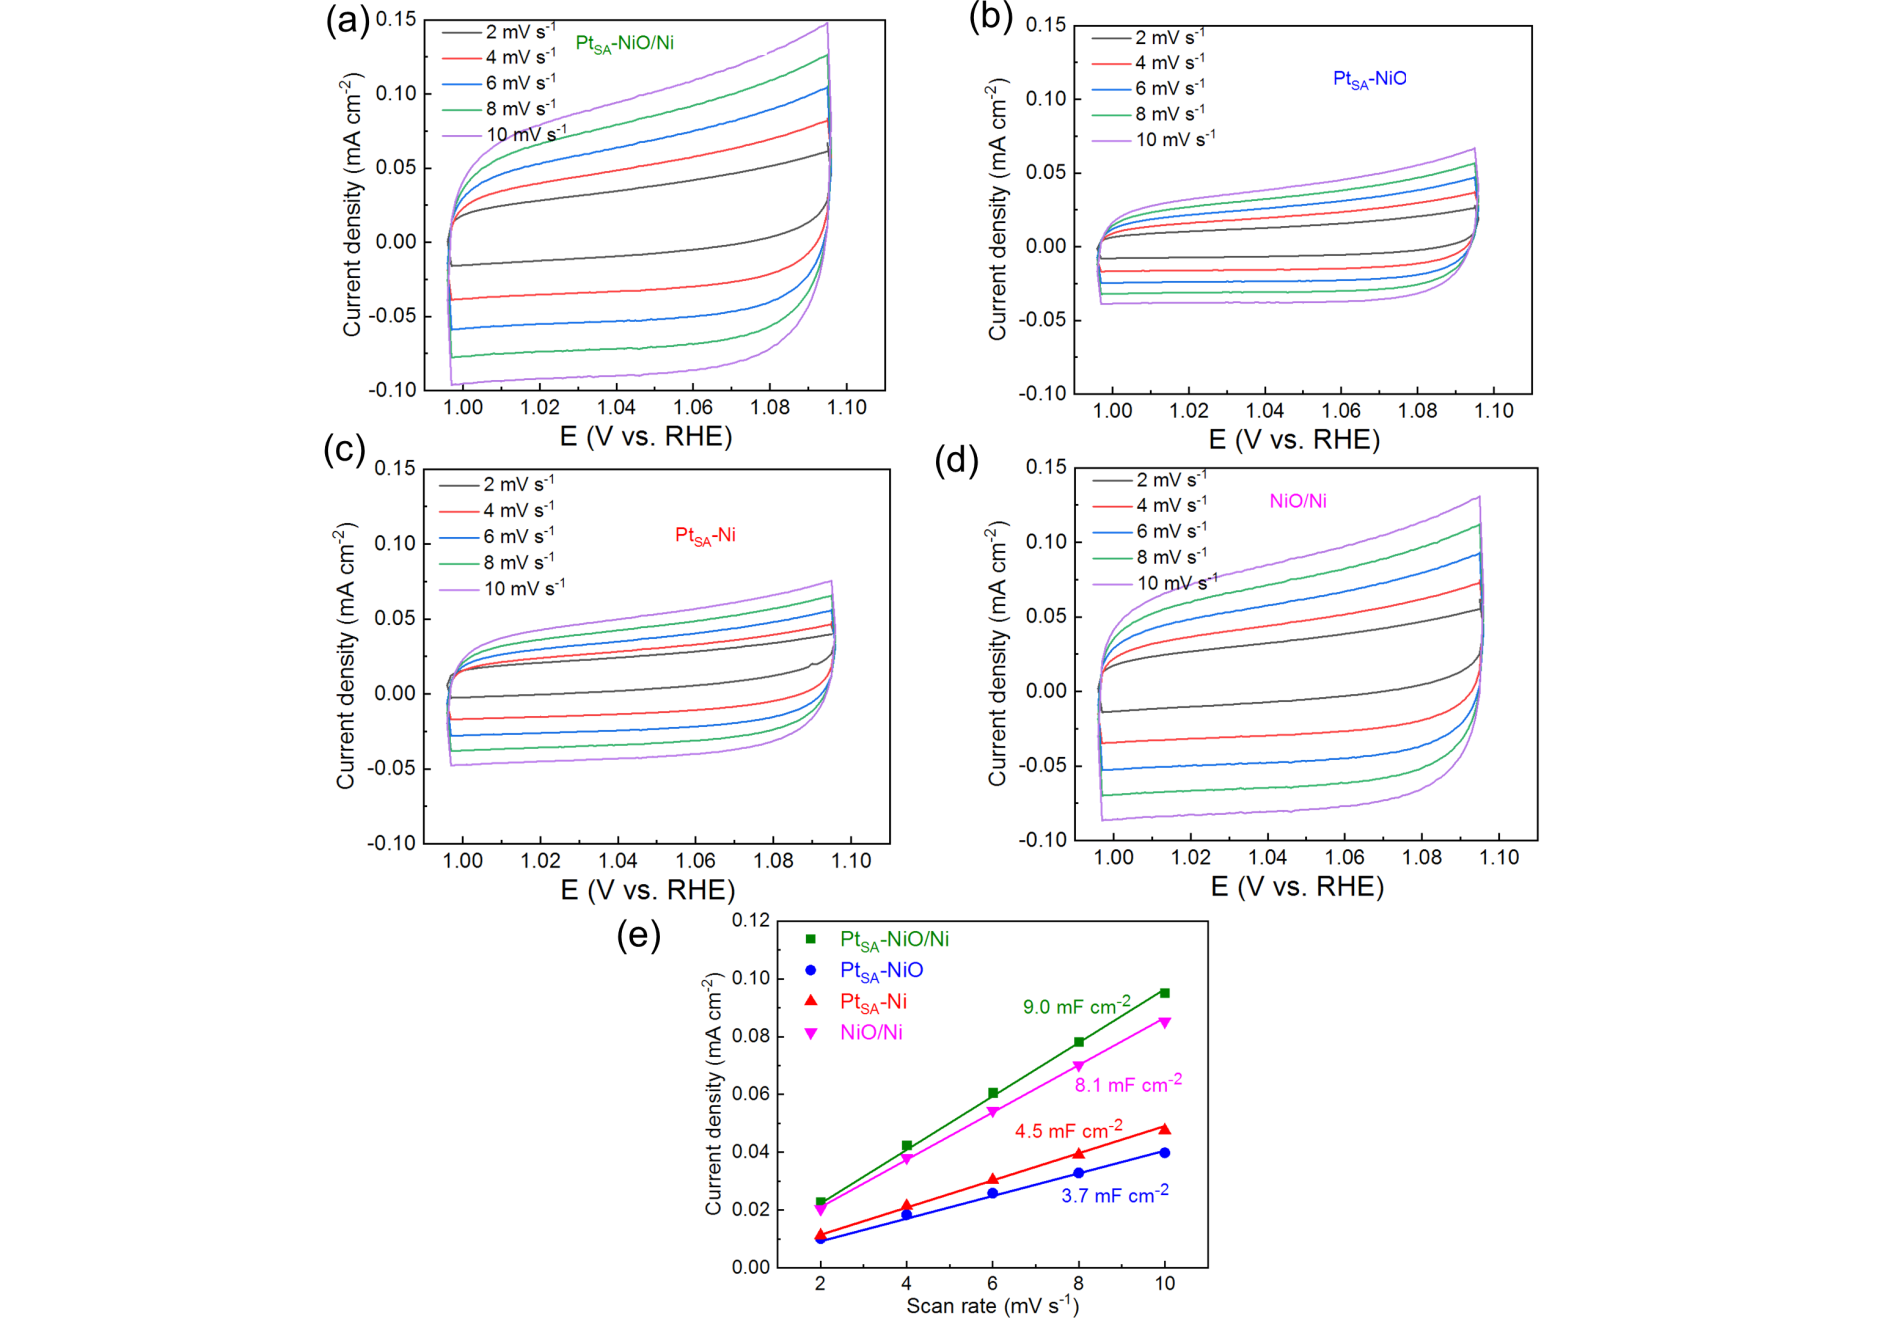


**Figure S27.** Cyclic voltammograms performed in 1 M KOH solution in the potential window without the participation of faradaic processes for (a) PtSA-NiO/Ni, (b) PtSA-NiO, (c) PtSA-Ni, and (d) NiO/Ni. (e) The corresponding scan rate dependence of the average currents.


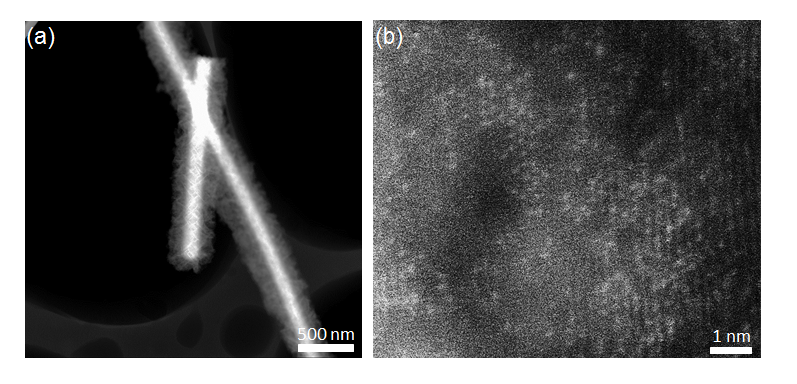


**Figure S28.** HAADF-STEM image of PtSA-NiO/Ni after the stability test.


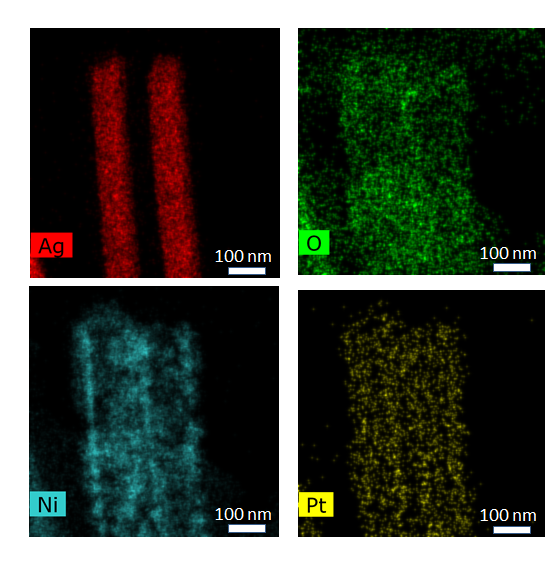


**Figure S29.** Elements mapping of PtSA-NiO/Ni after the stability test.


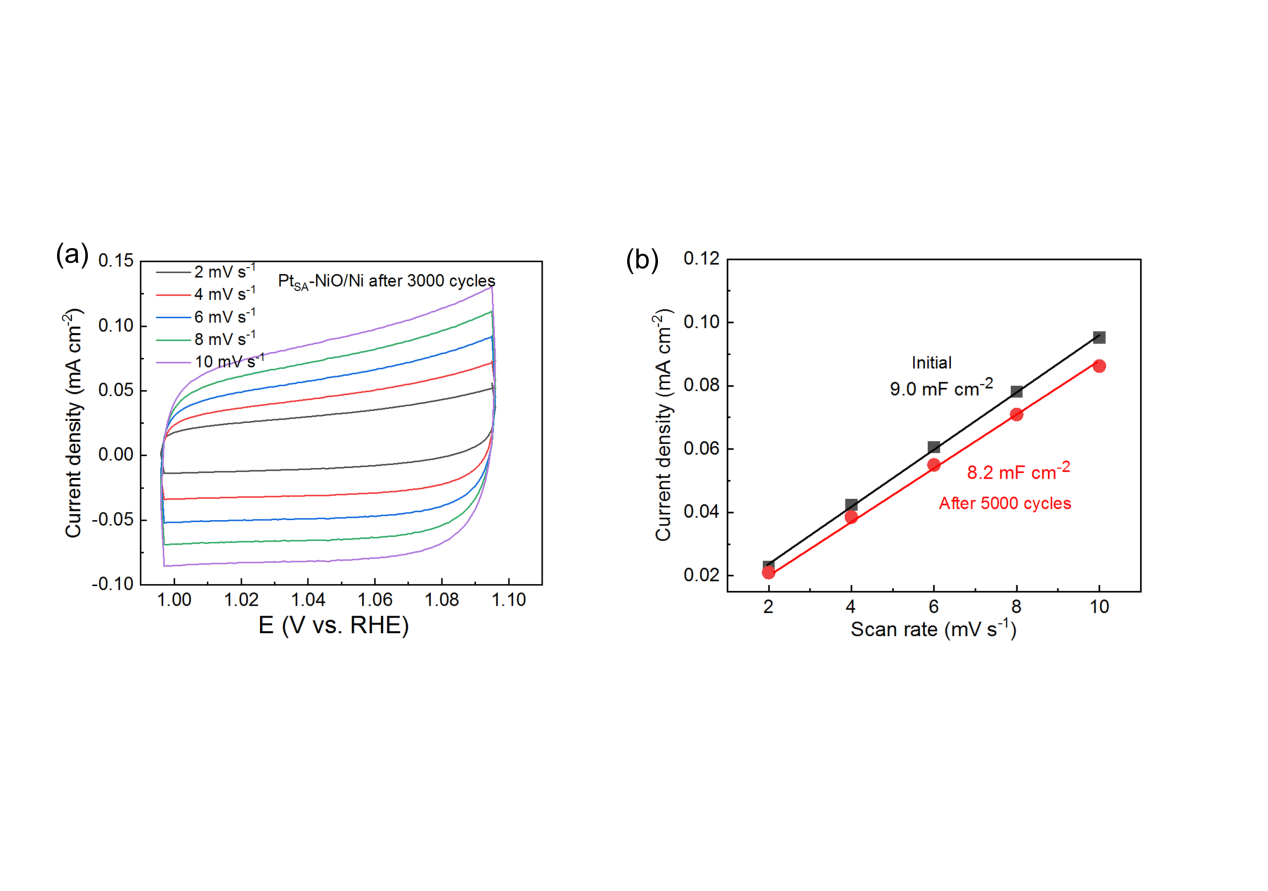


**Figure S30.** The double-layer capacitance measurement of PtSA-NiO/Ni after the stability test.

**Table S1.** FT-EXAFS fitting results of PtSA-NiO/Ni, PtSA-NiO and PtSA-Ni, and Pt foil was given as a reference.

|  | Shell | *CN* | *R*(Å) | *σ*2 | Δ*E*0 | *R* factor |
| --- | --- | --- | --- | --- | --- | --- |
| Pt foil | Pt-Pt | 12 | 2.76±0.01 | 0.004 | 10.4±0.6 | 0.0017 |
| PtSA-NiO/Ni | Pt-Ni | 5.87±0.5 | 2.60±0.01 | 0.012 | 9.2±2.0 | 0.0095 |
| Pt-O | 1.31±0.2 | 1.99±0.02 | 0.001 |
| Pt-Cl | 1.91±0.5 | 3.10±0.02 | 0.004 |
| PtSA-NiO | Pt-Ni | 2.14±0.2 | 2.70±0.01 | 0.005 | 18.6±1.8 | 0.0099 |
| Pt-O | 2.41±0.2 | 2.07±0.02 | 0.009 |
| Pt-Cl | 1.62±0.3 | 3.20±0.02 | 0.004 |
| PtSA-Ni | Pt-Ni | 4.97±0.5 | 2.63±0.01 | 0.010 | 16.9±2.4 | 0.0054 |
| Pt-Cl | 1.40±0.2 | 2.31±0.01 | 0.002 |

*CN*: coordination numbers of identical atoms; *R*: interatomic distance; *σ*2: Debye-Waller factors; Δ*E*0: energy shift. *R* factor: goodness of fit. *Ѕ*02 was set to 0.74, according to the experimental EXAFS fit of Pt foil reference by fixing *CN* as the known crystallographic value.

**Table S2.** Comparison of HER performances for Ag NWs supported PtSA-NiO/Ni with the reported HER catalysts.

|  | Electrocatalysts | Electrolyte | Overpotential  at 10 mA cm-2 (mV) | Tafel slop  (mV dec-1) | Reference |
| --- | --- | --- | --- | --- | --- |
| **1** | **PtSA-NiO/Ni** | **1.0 M KOH** | **26** | **27** | **This work** |
| 2 | PtSA-C1N1 | 1.0 M KOH | 46 | 36.8 | Nat. Commun., 2020, 11:1029. |
| 3 | Ru-MoS2/CC | 1.0 M KOH | 41 | 114 | Appl. Catal., B, 2019, 249, 91. |
| 4 | PtSA-Co(OH)2 | 1.0 M KOH | 29 | 35 | Energy Environ. Sci., 2020, 13:3082. |
| 5 | RuCo@N-C | 1.0 M KOH | 28 | 31 | Nat. Commun., 2017, 8, 14969. |
| 6 | Ru-MoO2 | 1.0 M KOH | 29 | 44 | J. Mater. Chem. A, 2017, 5, 5475-5485. |
| 7 | PtNi NWs/C | 1.0 M KOH | 40 | - | Angew. Chem.Int. Ed., 2016, 55, 12859. |
| 8 | IrCo@N-C | 1.0 M KOH | 45 | 80 | Adv. Mater., 2018, 30,1705324. |
| 9 | Hexagonal-PtNi | 1.0 M KOH | 65 | 74 | Nat. Commun., 2017, 8, 15131. |
| 10 | Ru/C3N4/C | 0.1 M KOH | 79 | - | J. Am. Chem. Soc., 2016, 138, 16174. |
| 11 | Cu2-*x*S@Ru | 1.0 M KOH | 82 | 48 | Small, 2017, 13, 1700052. |
| 12 | PtNi-O/C | 0.1 M KOH | 40 | 79 | J. Am. Chem. Soc., 2018, 140, 9046. |
| 13 | Pt-Ni ASs | 1.0 M KOH | 28 | 27 | Adv. Mater., 2018,30, 1801741. |
| 14 | Pt3.6Ni-S NWs | 0.1 M KOH | 38 | - | Angew Chem. Int. Ed., 2018, 130,11852. |
| 15 | Rh2P | 1.0 M KOH | 30 | - | Adv. Energy Mater., 2018, 8,1703489. |
| 16 | hcp excavated PtNi | 0.1 M KOH | 38 | 42 | Inorg. Chem. Front., 2018,5, 1365. |
| 17 | Ni(OH)2-PtO2 NS/Ti | 0.1 M KOH | 44 | 89 | J. Mater. Chem. A, 2018, 6, 1967. |
| 18 | Pt3Ni2 NWs-S/C | 0.1 M KOH | 45 | - | Nat. Commun., 2017, 8, 14580. |
| 19 | Mo2TiC2T*x*-PtSA | 0.5 M H2SO4 | 30 | 30 | Nat. Catal., 2018, 1, 985. |
| 20 | PtSA/OLC | 0.5 M H2SO4 | 38 | 36 | Nat. Energy, 2019, 4, 512. |
| 21 | Pt-MWCNTs | 0.5 M H2SO4 | 44 | 30 | Nano Energy, 2019, 63, 1038. |
| 22 | Pt-MoS2 | 0.1 M H2SO4 | 60 | 96 | Energy Environ. Sci., 2015, 8, 1594. |
| 23 | er-WS2-Pt | 0.5 M H2SO4 | 40 | 27 | Adv. Mater., 2017, 1704779. |
| 24 | Pt@PCM | 0.5 M H2SO4 | 105 | 63 | Sci. Adv., 2018, 4, 6657. |
| 25 | ALD50 Pt/NGNs | 0.5 M H2SO4 | 39 | 29 | Nat. Commun., 2016, 7, 13638. |
| 26 | PtSA/m-WO3-*x* | 0.5 M H2SO4 | 38 | 45 | Angew. Chem., Int. Ed., 2019, 131, 16184. |
| 27 | PtSA/S-C | 0.5 M H2SO4 | 53 | 46 | Nat. Communicat., 2019, 10, 1. |
| 28 | Ru/N-C NWs | 0.1 M H2SO4 | 47 | 14 | Nat. Communicat., 2019, 10, 1. |
| 29 | Pd-Graphdiyne | 0.5 M H2SO4 | 55 | 47 | iScience, 2019, 11, 31. |
| 30 | PtN*x*/TiO2 | 0.5 M H2SO4 | 67 | 34 | Nano Energy, 2020, 73, 104739 |
| 31 | PtML/Au NF/Ni foam | 0.5 M H2SO4 | 60 | 53 | Sci. Adv., 2015, 1, e1400268. |
| 32 | Rh/SiNW | 0.5 M H2SO4 | 85 | 24 | Nat. Commun., 2016, 7, 12272. |
| 33 | Pt@PM | 0.5 M H2SO4 | 106 | 65 | Sci. Adv., 2018, 4, eaao6657. |
| 34 | RuP2@NPC | 0.5 M H2SO4 | 38 | 38 | Angew. Chem., Int. Ed., 2017, 56, 11559. |
| 35 | NiO-Ni/CNT | 1.0 M KOH | 86 | 82 | Nat. Commun., 2014, 5, 4695. |
| 36 | Ni NP/Ni-NC | 1.0 M KOH | 147 | 114 | Energy Environ. Sci., 2019, 12, 149. |
| 37 | Ni/NiP | 1.0 M KOH | 130 | 58 | Adv. Funct. Mater., 2016, 26, 3314. |
| 38 | CoP/NCNHP | 1.0 M KOH | 115 | 66 | J. Am. Chem. Soc., 2018, 140, 2610. |
| 39 | Co2P | 1.0 M KOH | 160 | 61 | Adv. Mater., 2017, 29, 1606980. |
| 40 | NiCoN/C nanocages | 1.0 M KOH | 103 | - | Adv. Mater., 2019, 31, 1805541. |
| 41 | Co doped *β*-Mo2C | 1.0 M KOH | 141 | 62 | Adv. Funct. Mater., 2020, 30, 2000561. |
| 42 | NiP2 NS/CC | 1.0 M KOH | 102 | 64 | Nanoscale, 2014, 6, 13440. |

**Supplementary Note 1**. Turnover frequency (TOF) calculation of the Pt-based catalysts.

The TOF per Pt site of the fabricated Pt-based catalysts in this work was calculated by using the formula:

**TOF (H2/s) =**

The total number of hydrogen turnovers could be obtained by the current density as the following formula:

**# total hydrogen turnover:**

**= (**|*j*|**) () () () ()**

**= 3.12**

The number of catalytic active sites in the Pt-based catalysts was calculated according to the mass loading on the electrode, the Pt contents, and the Pt atomic weight with a hypothesis that each Pt atom accounts for one catalytic active site:

**# Pt active site:**

**=**

Hence, the Pt active site in PtSA-NiO/Ni can be calculated to be:

**=**

**= 2.03**

So, the TOFs of per Pt site in PtSA-NiO/Ni can be calculated to be:

**=** |*j*|

= **0.18**|*j*|
